# Supplementary material for: Hybrid Coatings Enriched with Tetraethoxysilane for Corrosion Mitigation of Hot-Dip Galvanized Steel in Chloride Contaminated Simulated Concrete Pore Solutions
Source: PubMed Central journal article supplement (PMC5503348; doi:10.3390/ma10030306), 2017-03-17
Supplement: materials-10-00306-s001.pdf [file materials-10-00306-s001.pdf]

## Supplementary Material

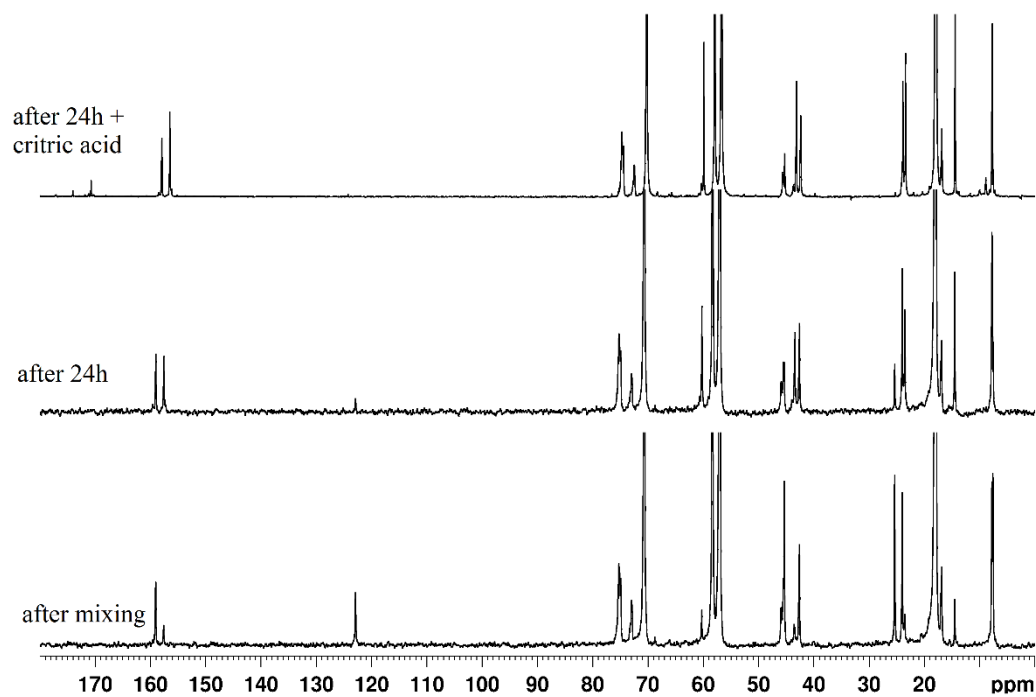

**Figure S1.**  $^{13}\text{C}$  NMR of the mixture Jeffamine 600/ICPTES (1:4.16) in ethanol- $\text{d}_6$  immediately after mixing and after 24h and with subsequent addition of citric acid.

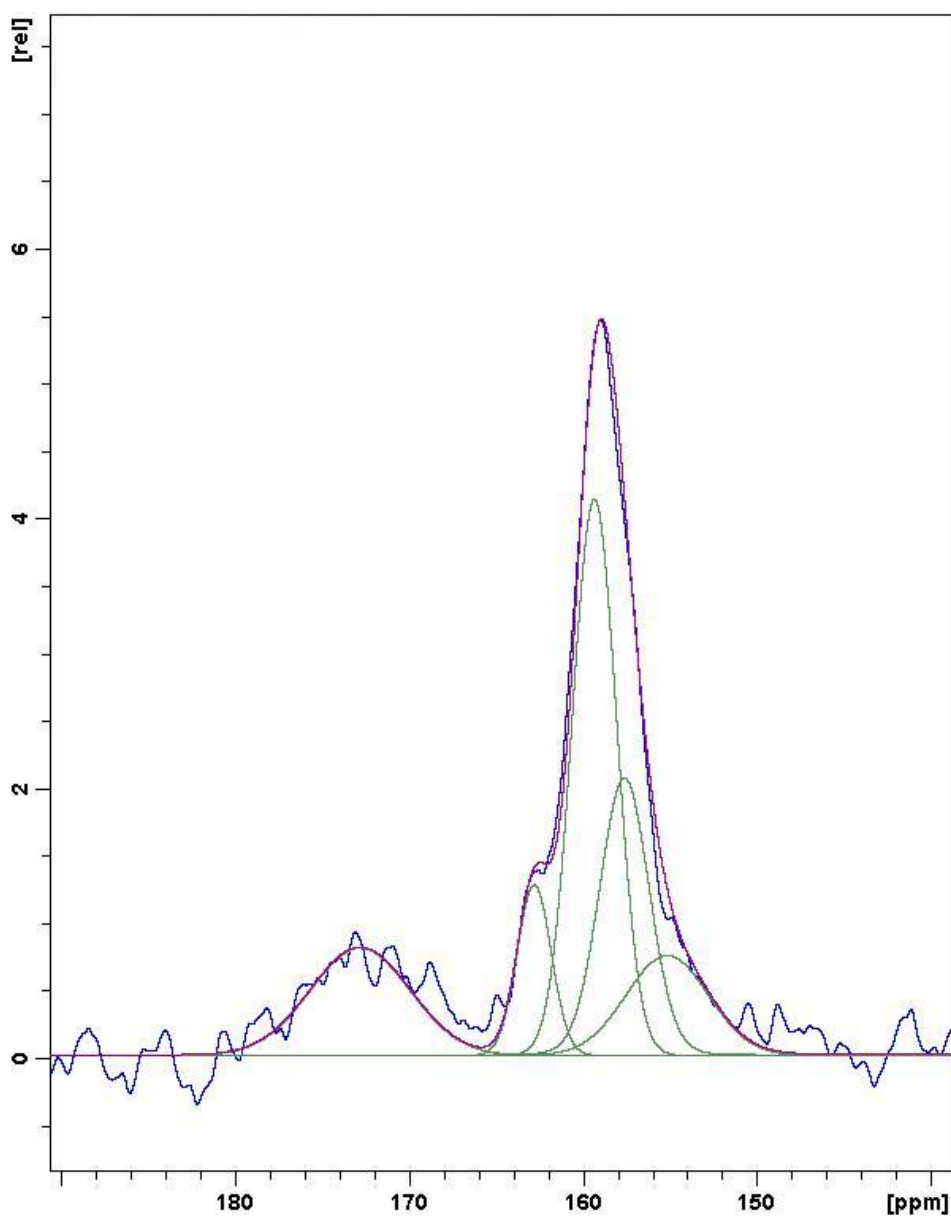

**Figure S2.** Lowfield part of the  $^{13}\text{C}$  CPMAS spectrum of U(900): 3.45TEOS.

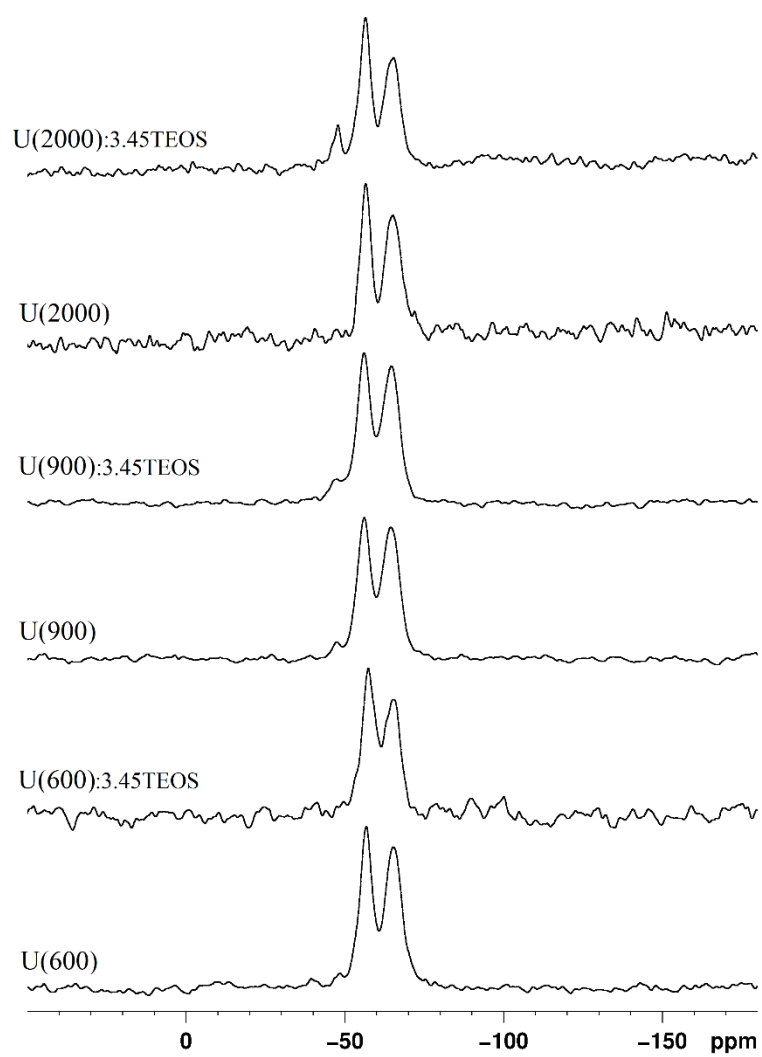

**Figure S3.**  $^{29}\text{Si}$  CPMAS NMR spectra of OIH samples prepared with and without TEOS.
